# Supplementary material
Source: PubMed Central journal article supplement (PMC7812786)
Supplement: pnas.1922859118.sapp.pdf [file pnas.1922859118.sapp.pdf]

## Supplementary Information

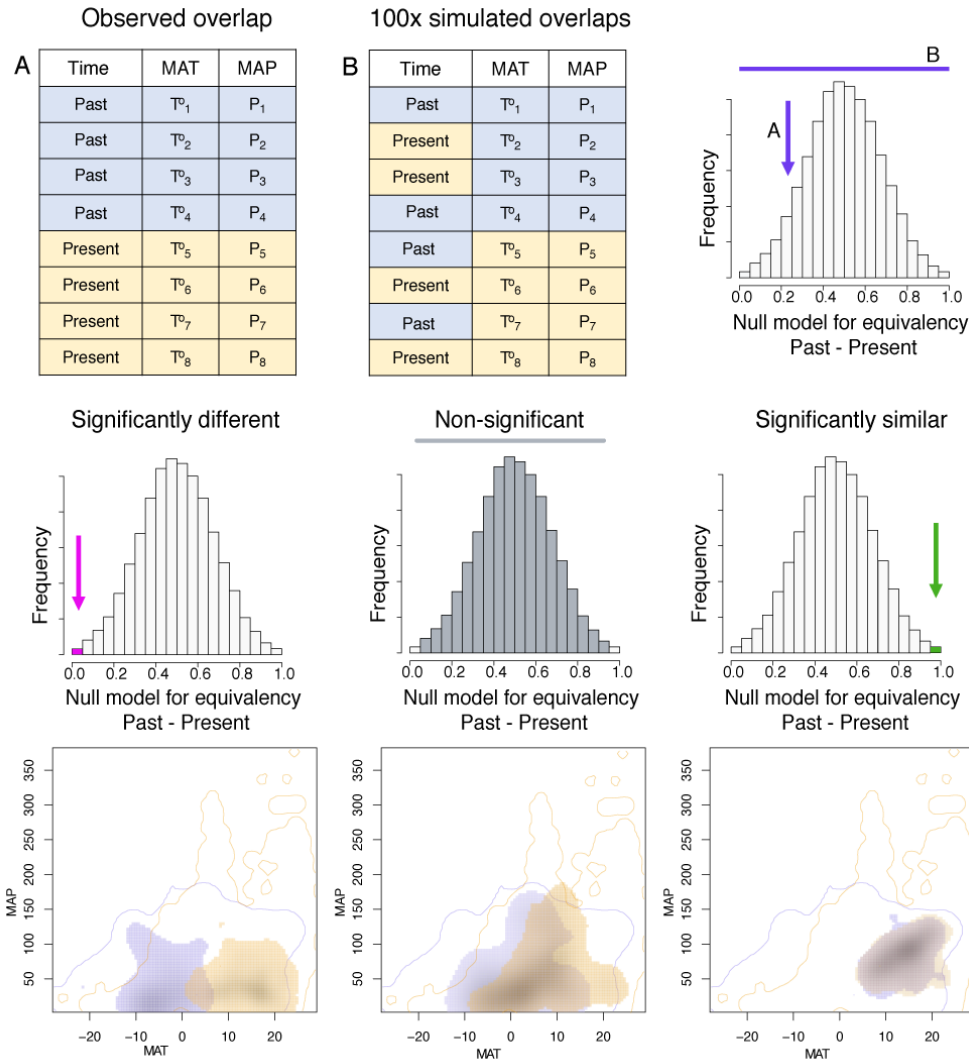

**Figure S1.**

Graphic representation of the niche equivalency test as described by Warren et al. (2008). For a species in two different time bins  $T_1$  (past) and  $T_2$  (present) with  $N_{T1}$  and  $N_{T2}$  number of occurrences, respectively, it first calculates the observed overlap. Overlap is calculated calculating the proportion of cells that are common across two different time intervals using the Kernel densities from their realized niches. Then, it creates a pseudoreplicate dataset by randomly shuffling the time category while holding the number of pairs in each time interval constant. It then calculates the overlap  $D$  metric for this pseudoreplicated data (A). It repeats this process 100 times to create a null distribution of  $D$  values (B). The observed  $D$  value is compared to the null distribution. As described in Warren et al. (2008) and Di Cola et al. (2017), if the observed  $D$  value of a species falls below the lower 5th percentile (pink arrow), the species has a non-equivalent niche across two time periods. If it falls over the 95th percentile (green arrow), the species is considered to have a higher equivalency between two time intervals than expected from the null model.

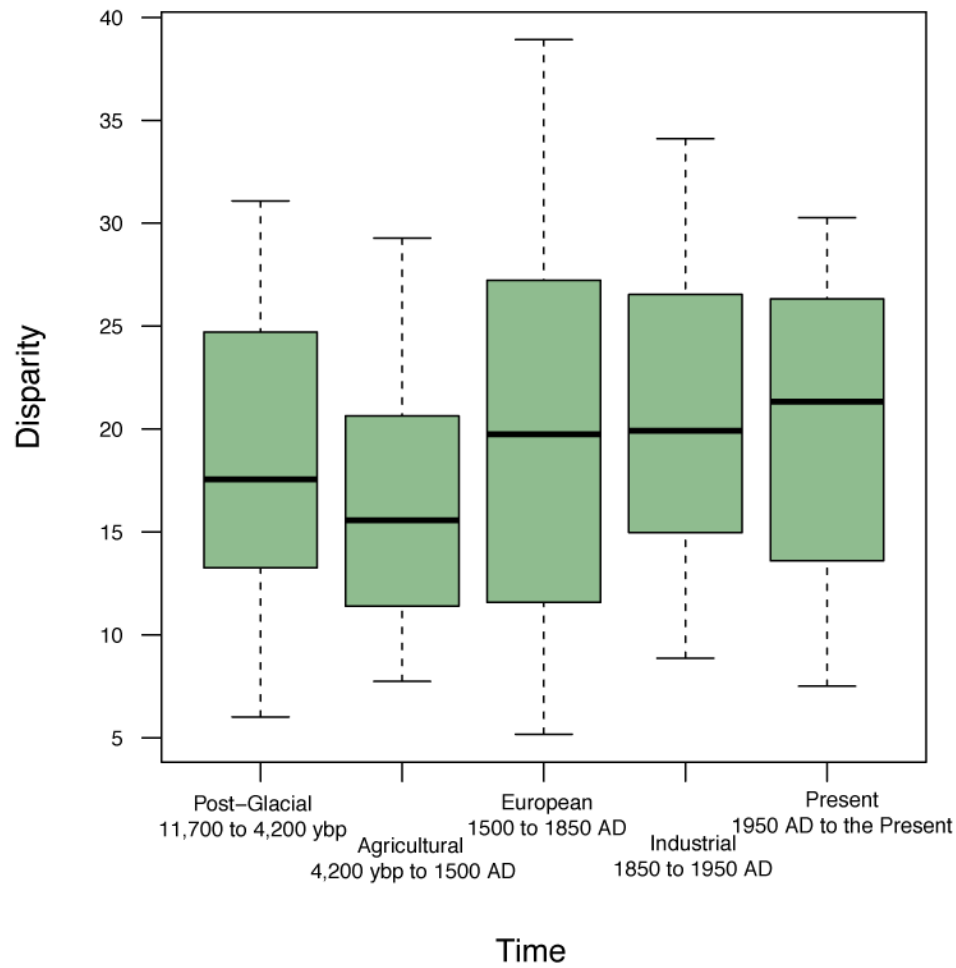

**Figure S2.**

Niche disparity of the 46 species in the analysis for 5 different time intervals. Note that Time intervals with the longer time extents do not display higher disparity, for what we can conclude that time averaging is not driving the results in our analysis.

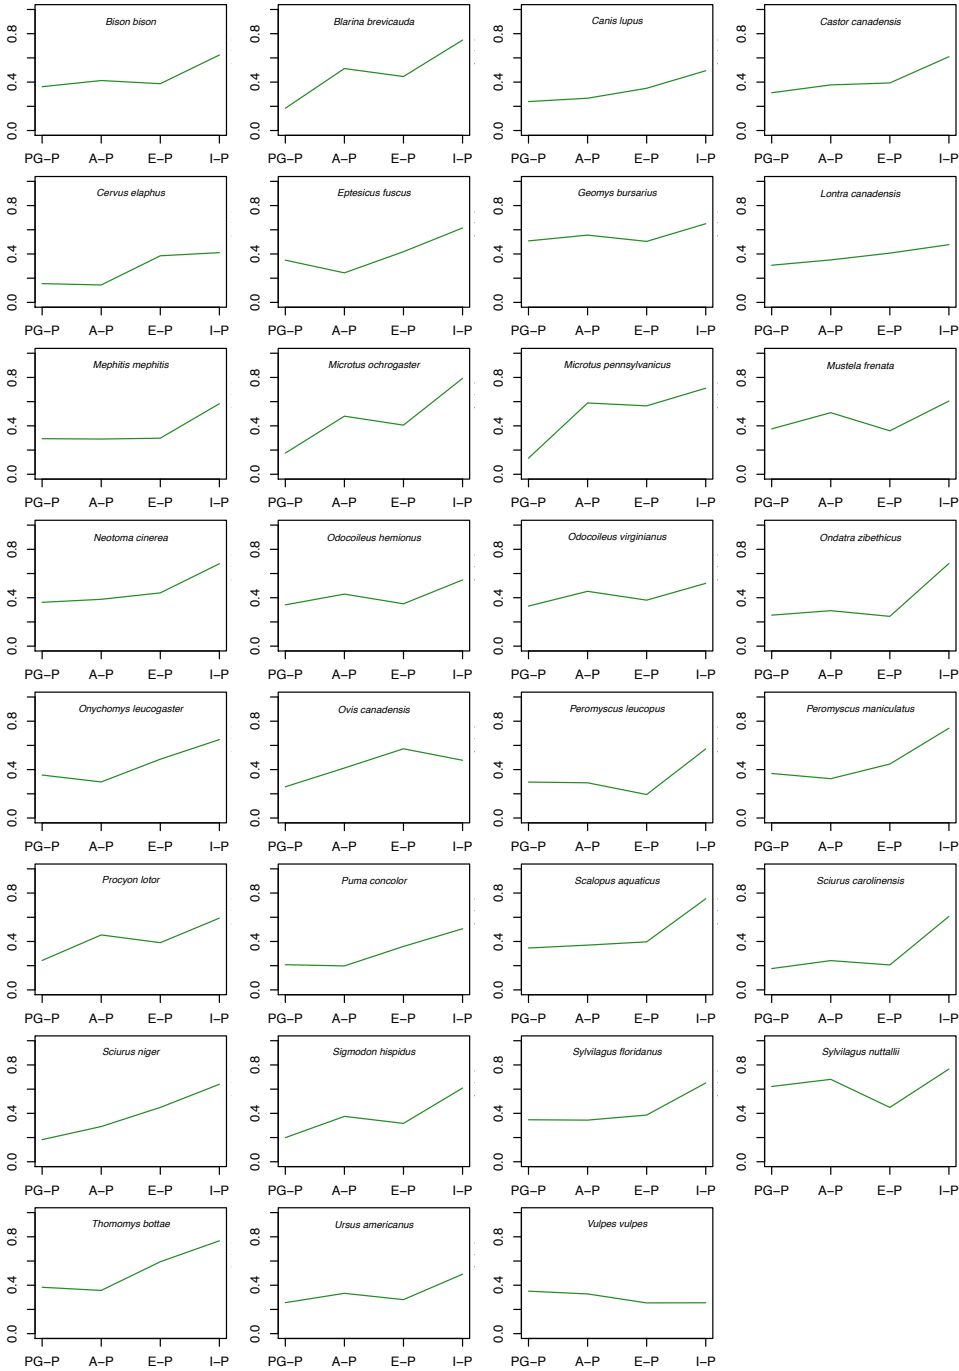

**Figure S3.**

Overlap between past time intervals and the present for the 31 species of mammals that significantly changed their niche after the Industrial Revolution in North America. Y axes represent overlap (D). PG: Post-Glacial; A: Agricultural; E: European; I: Industrial; P: Present (see methods).

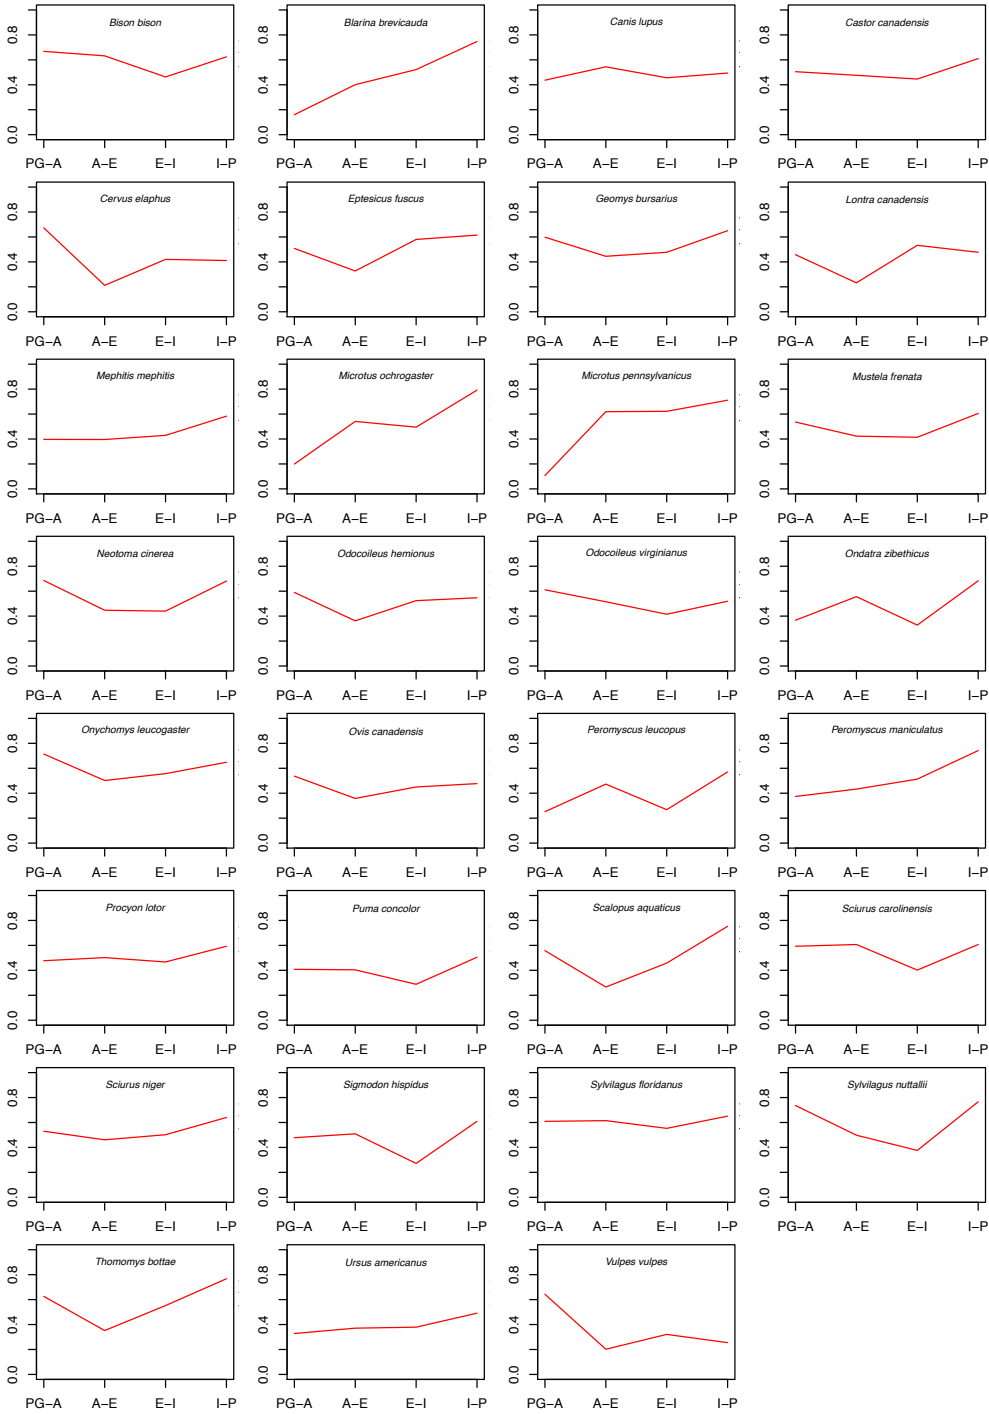

**Figure S4.**

Overlap between sequential time intervals from the Post-Glacial to the Present for the 31 species of mammals that significantly changed their niche after the Industrial Revolution in North America. Y axes represent overlap (D). PG: Post-Glacial; A: Agricultural; E: European; I: Industrial; P: Present (see methods).

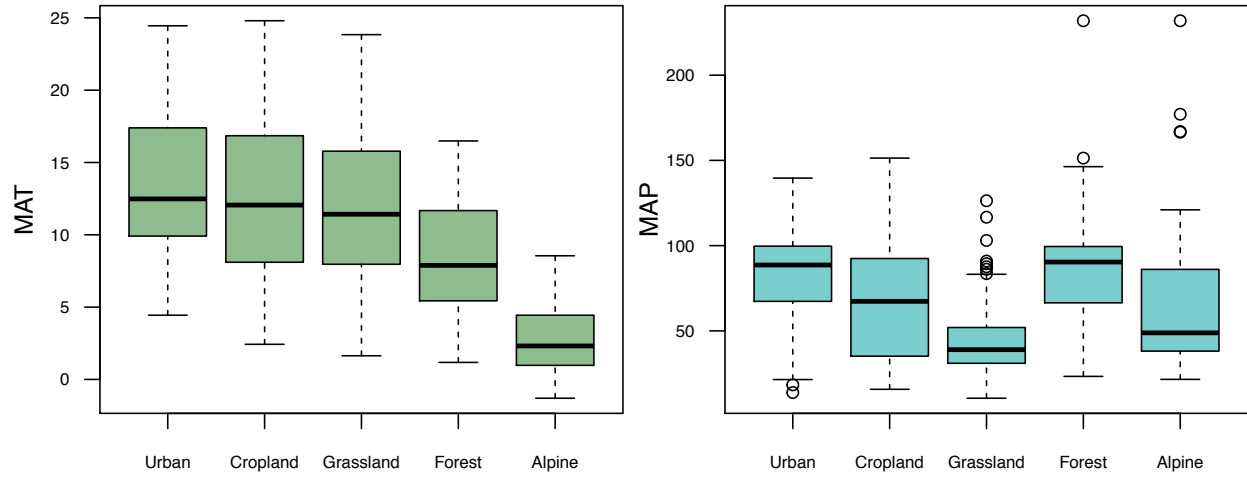

**Figure S5.**  
MAT and MAP for the 5 habitats studied in the land use analysis.

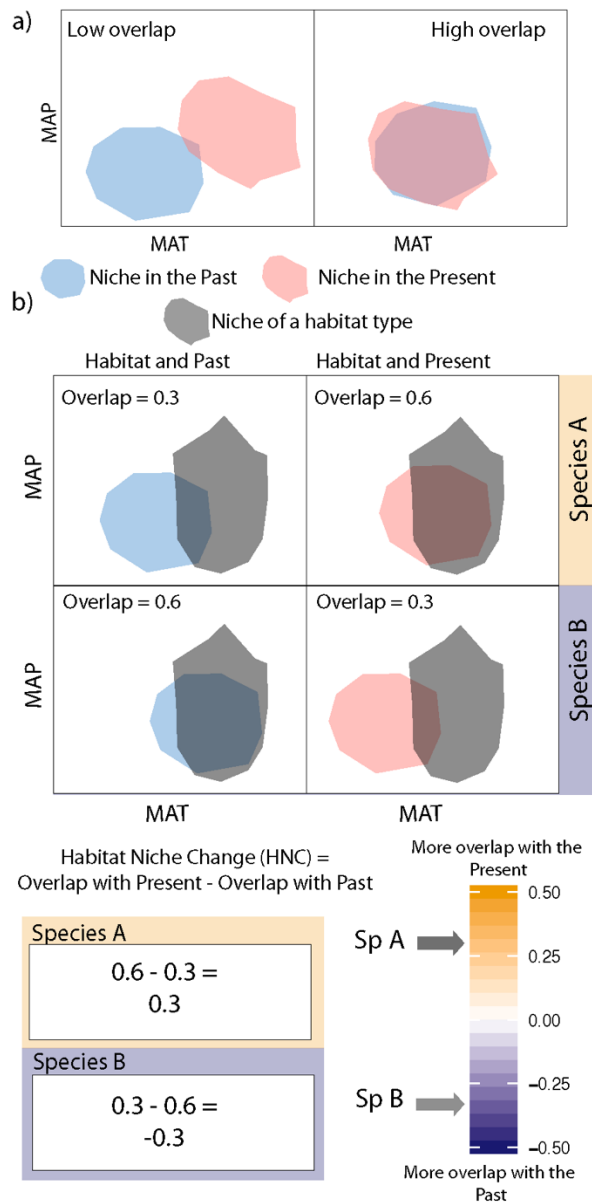

**Figure S6.**

a) Low versus high niche overlap. b) Calculating Habitat Niche Change (HNC; overlap difference). Species A expands into climates represented by this habitat type; whereas Species B contracts away from those climates. Niches are represented by polygons instead of Kernel densities for simplification purposes.

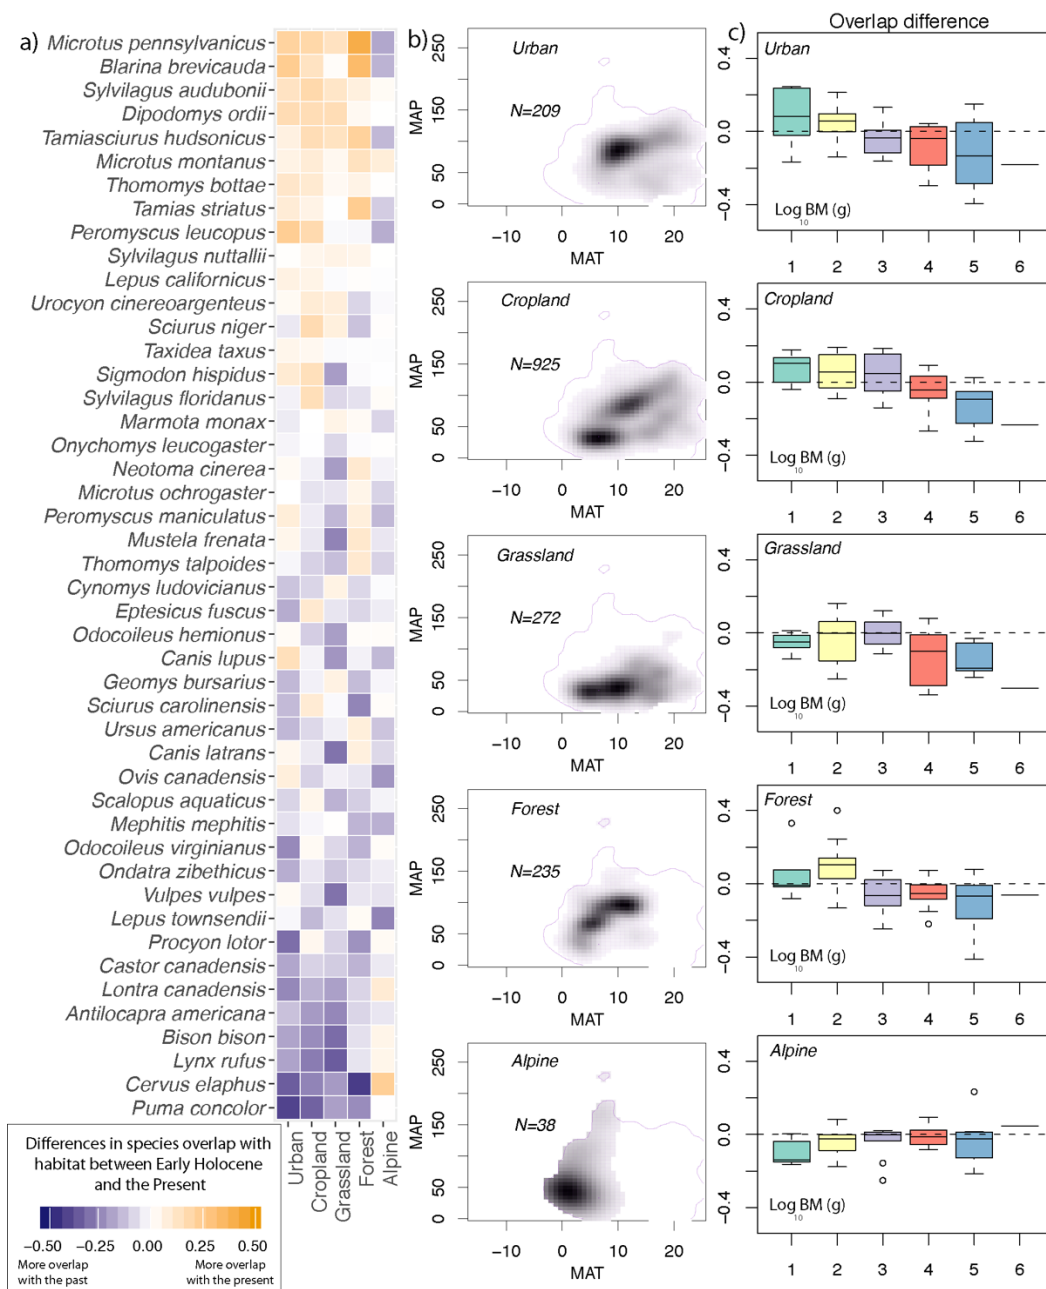

**Figure S7.**

a) Habitat Niche Change (HNC) between Post-Glacial and the Present time intervals for the 46 mammal species in the study and for 5 different land-cover (habitat) types. Species are ordered by average HNC value. b) Climatic niche described from MAT and MAP for 5 different habitat types. c) Average overlap difference (HNC) for each body mass category (log<sub>10</sub> body mass in grams) for the 46 species in the study and for each habitat type.

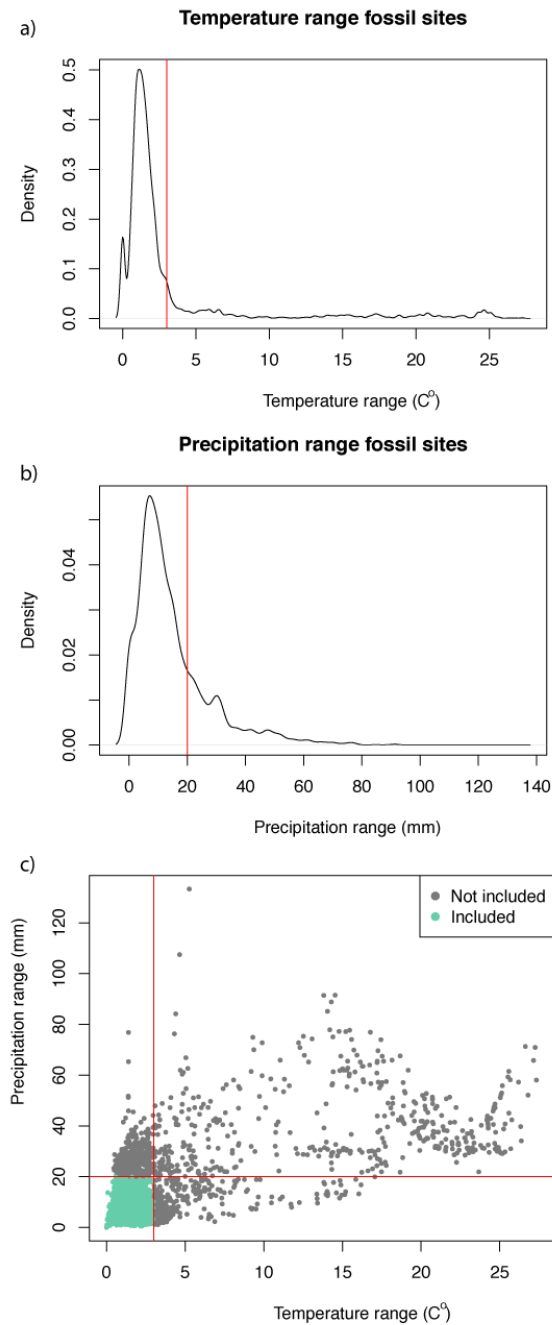

**Figure S8.**

Climatic range of the studied fossil sites. A) Temperature range. Red line indicates the 3oC threshold for excluding localities based on their temperature range. B) Precipitation range. Red line indicates the 20mm threshold for excluding localities based on their precipitation range. C) Temperature and precipitation range for the studied fossil localities. Green localities were included in the analysis, while grey localities were excluded for having temperature and/or precipitation ranged beyond the established threshold.



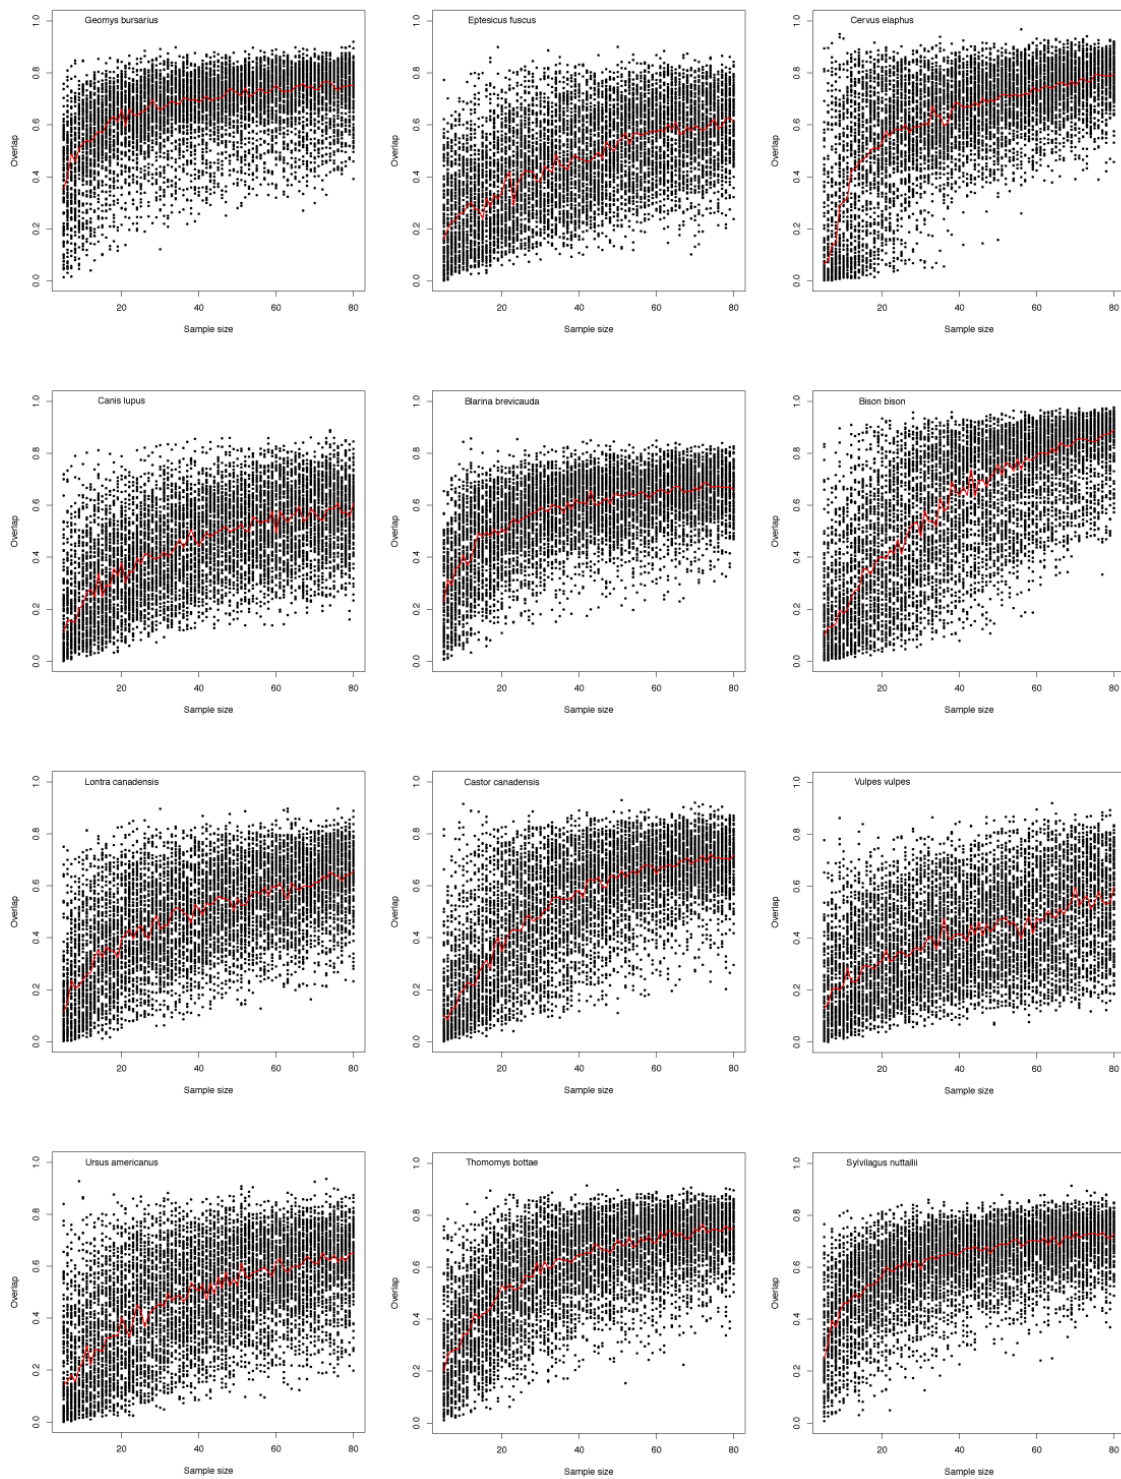

**Figure S9.**

Minimum sample size analysis for 12 species in the analysis. Red line indicates the medium for each sample size iteration from 5 to 80.

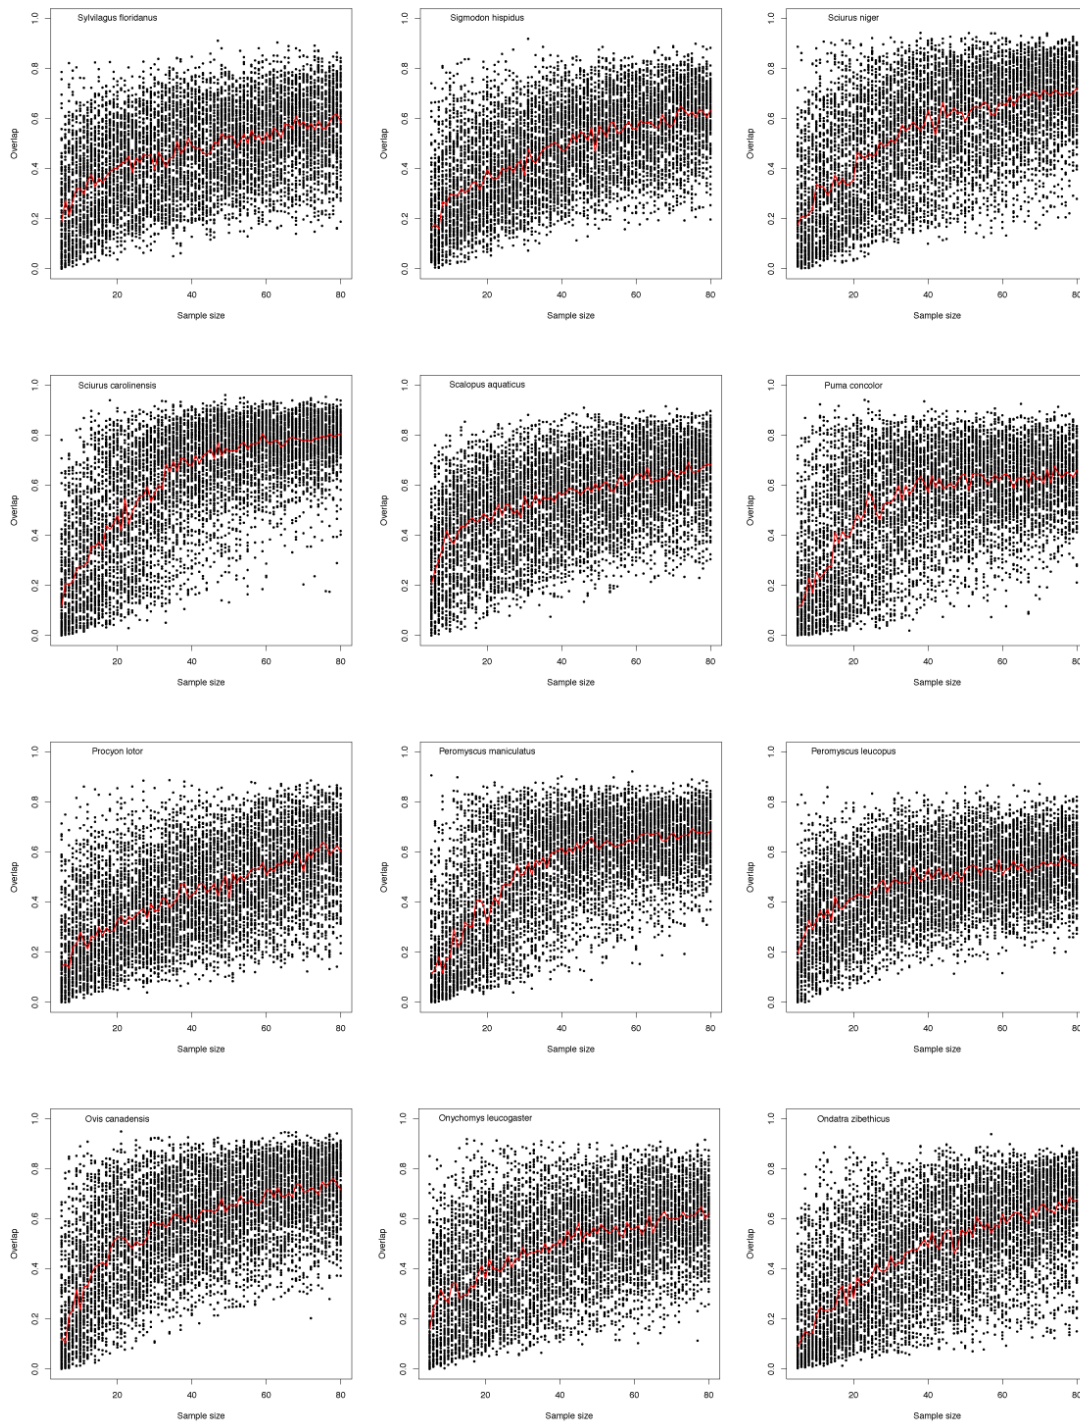

**Figure S10.**

Minimum sample size analysis for 12 species in the analysis. Red line indicates the medium for each sample size iteration from 5 to 80.

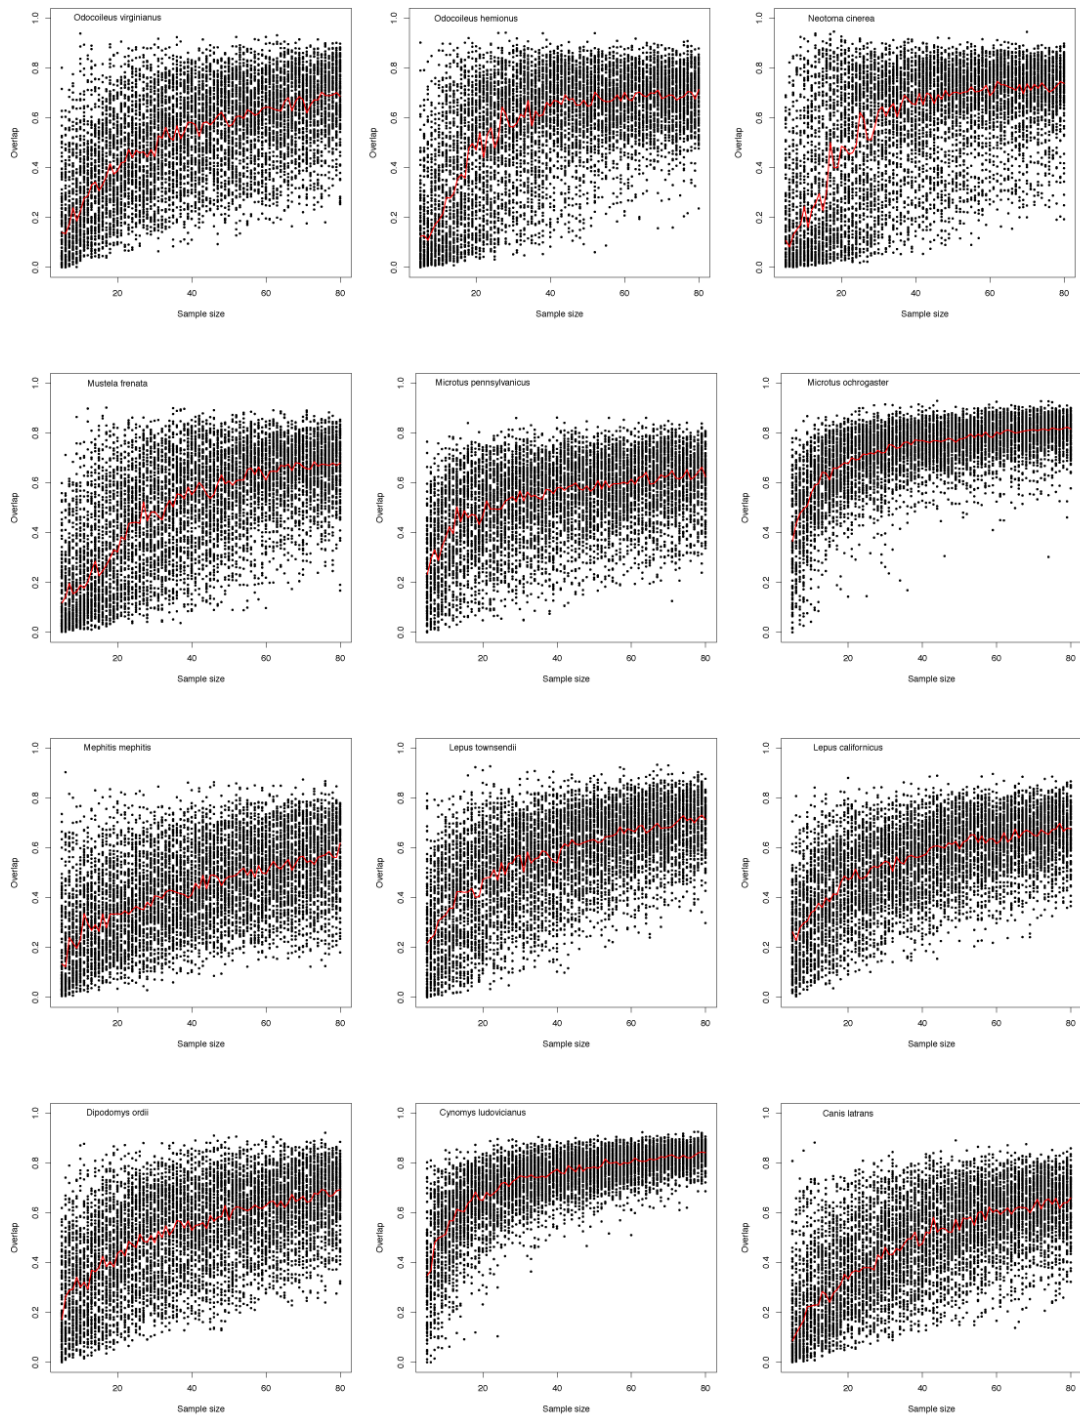

**Figure S11.**

Minimum sample size analysis for 12 species in the analysis. Red line indicates the medium for each sample size iteration from 5 to 80.

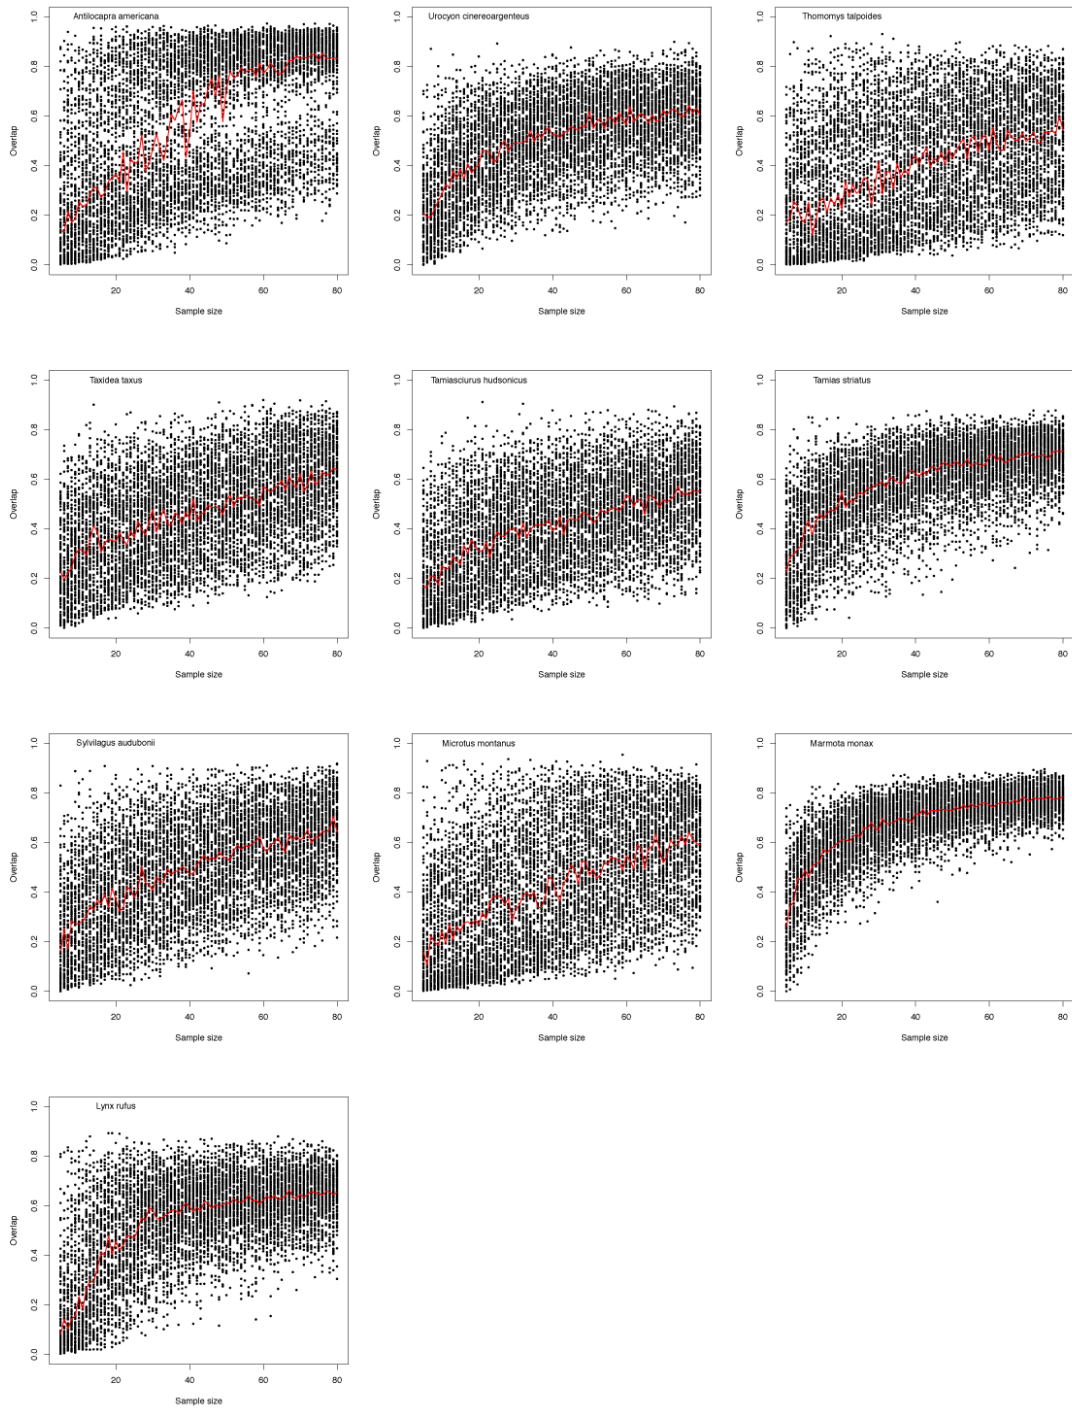

**Figure S12.**

Minimum sample size analysis for 12 species in the analysis. Red line indicates the medium for each sample size iteration from 5 to 80.

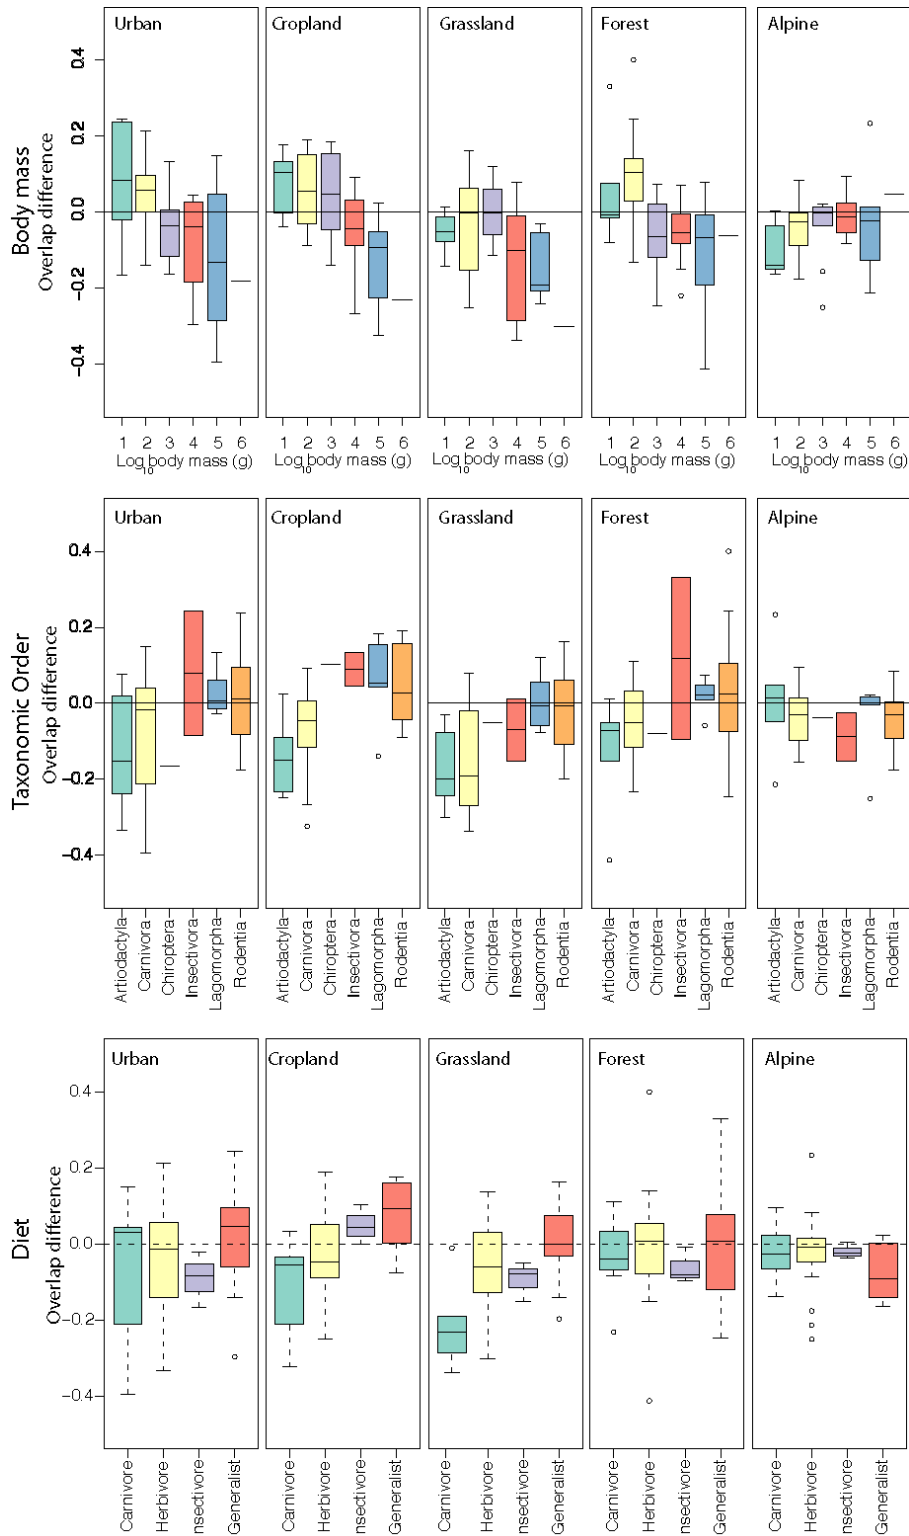

**Figure S13.**

Average overlap difference (Habitat Niche Change, HNC) for each body mass category ( $\log_{10}$  body mass in grams), taxonomic Order and dietary category for the 46 species in the study and for each habitat type. Horizontal dashed lines were added as a reference for where no overlap difference occurs (overlap difference = 0).

**Table S1.**

Land cover (habitat) categories used in the study. Land Use Cover (LUC) refers to the original dataset from the U.S. Geological Survey, Department of the Interior (catalog.data.gov). Our nomenclature indicates the name we gave it in our dataset. Used in the study indicates whether that particular land-cover was used in the present study.

| <b>LUC-ID</b> | <b>LUC – Nomenclature in the original dataset</b>                                                 | <b>Our classification</b> | <b>Used in study</b> |
|---------------|---------------------------------------------------------------------------------------------------|---------------------------|----------------------|
| 1             | Mostly cropland;                                                                                  | Cropland                  | Yes                  |
| 2             | Cropland with grazing land;                                                                       | Cropland                  | Yes                  |
| 3             | Cropland with pasture, woodland, and forest;                                                      | Cropland                  | Yes                  |
| 4             | Irrigated land;                                                                                   | Irrigated                 | No                   |
| 5             | Woodland and forest with some cropland and pasture;                                               | Woodland cropland         | No                   |
| 6             | Forest and woodland mostly grazed;                                                                | Grazed forest             | No                   |
| 7             | Forest and woodland mostly ungrazed;                                                              | Forest                    | Yes                  |
| 8             | Subhumid grassland and semiarid grazing land;                                                     | Grassland                 | Yes                  |
| 9             | Open woodland grazed (pinon, juniper, aspen groves, chaparral and brush);                         | Woodland grazed           | No                   |
| 10            | Desert shrubland grazed;                                                                          | Desert grazed             | No                   |
| 11            | Desert shrubland mostly ungrazed;                                                                 | Desert                    | No                   |
| 12            | Alpine meadows, mountain peaks above timber line, sparse dry tundra, lava flows, and barren land; | Alpine                    | Yes                  |
| 13            | Swamp;                                                                                            | Swamp                     | No                   |
| 14            | Marshland;                                                                                        | Marshland                 | No                   |
| 15            | Moist tundra and muskeg;                                                                          | Tundra                    | No                   |
| 16            | Urban areas;                                                                                      | Urban                     | Yes                  |
| 17            | Open water;                                                                                       | Open water                | No                   |
| 99            | Great Lakes, Canada.                                                                              | Lakes                     | No                   |

**Table S2.**

Species counts (number of occurrences) for each time interval and as total

|                                | Post-Glacial | Agricultural | European | Industrial | Present | Total |
|--------------------------------|--------------|--------------|----------|------------|---------|-------|
| <i>Antilocapra americana</i>   | 99           | 302          | 76       | 141        | 191     | 809   |
| <i>Bison bison</i>             | 130          | 387          | 108      | 104        | 94      | 823   |
| <i>Blarina brevicauda</i>      | 41           | 71           | 58       | 712        | 1304    | 2186  |
| <i>Canis latrans</i>           | 97           | 193          | 90       | 991        | 1179    | 2550  |
| <i>Canis lupus</i>             | 43           | 116          | 79       | 271        | 466     | 975   |
| <i>Castor canadensis</i>       | 109          | 485          | 126      | 355        | 469     | 1544  |
| <i>Cervus elaphus</i>          | 78           | 365          | 116      | 105        | 186     | 850   |
| <i>Cynomys ludovicianus</i>    | 27           | 69           | 41       | 203        | 288     | 628   |
| <i>Dipodomys ordii</i>         | 28           | 60           | 65       | 704        | 1386    | 2243  |
| <i>Eptesicus fuscus</i>        | 52           | 27           | 55       | 876        | 1716    | 2726  |
| <i>Geomys bursarius</i>        | 61           | 187          | 25       | 229        | 734     | 1236  |
| <i>Lepus californicus</i>      | 94           | 192          | 30       | 726        | 729     | 1771  |
| <i>Lepus townsendii</i>        | 26           | 66           | 29       | 274        | 244     | 639   |
| <i>Lontra canadensis</i>       | 30           | 121          | 53       | 142        | 481     | 827   |
| <i>Lynx rufus</i>              | 79           | 255          | 118      | 701        | 1129    | 2282  |
| <i>Marmota monax</i>           | 65           | 172          | 55       | 385        | 351     | 1028  |
| <i>Mephitis mephitis</i>       | 74           | 233          | 101      | 862        | 898     | 2168  |
| <i>Microtus montanus</i>       | 22           | 38           | 28       | 489        | 812     | 1389  |
| <i>Microtus ochrogaster</i>    | 43           | 67           | 50       | 255        | 636     | 1051  |
| <i>Microtus pennsylvanicus</i> | 54           | 70           | 95       | 655        | 1143    | 2017  |
| <i>Mustela frenata</i>         | 45           | 76           | 74       | 1031       | 868     | 2094  |
| <i>Neotoma cinerea</i>         | 93           | 98           | 41       | 494        | 619     | 1345  |
| <i>Odocoileus hemionus</i>     | 80           | 208          | 81       | 502        | 545     | 1416  |
| <i>Odocoileus virginianus</i>  | 143          | 559          | 117      | 365        | 650     | 1834  |
| <i>Ondatra zibethicus</i>      | 106          | 299          | 102      | 737        | 770     | 2014  |
| <i>Onychomys leucogaster</i>   | 55           | 72           | 52       | 477        | 1109    | 1765  |
| <i>Ovis canadensis</i>         | 107          | 259          | 88       | 168        | 185     | 807   |
| <i>Peromyscus leucopus</i>     | 20           | 41           | 88       | 868        | 2729    | 3746  |
| <i>Peromyscus maniculatus</i>  | 45           | 115          | 220      | 2651       | 4932    | 7963  |
| <i>Procyon lotor</i>           | 118          | 445          | 123      | 648        | 1289    | 2623  |
| <i>Puma concolor</i>           | 23           | 59           | 58       | 243        | 358     | 741   |
| <i>Scalopus aquaticus</i>      | 86           | 148          | 59       | 538        | 572     | 1403  |
| <i>Sciurus carolinensis</i>    | 55           | 149          | 94       | 621        | 930     | 1849  |
| <i>Sciurus niger</i>           | 29           | 142          | 46       | 648        | 1165    | 2030  |
| <i>Sigmodon hispidus</i>       | 72           | 100          | 51       | 433        | 1482    | 2138  |
| <i>Sylvilagus audubonii</i>    | 23           | 114          | 41       | 678        | 885     | 1741  |
| <i>Sylvilagus floridanus</i>   | 82           | 245          | 46       | 684        | 1111    | 2168  |
| <i>Sylvilagus nuttallii</i>    | 57           | 119          | 22       | 335        | 338     | 871   |

**Table S3.**

Summary of variables calculated in the study and their correspondent R function.

| Variable    | Statistic name    | R function                                    | Package                 | Description                                                                                                                                                                              |
|-------------|-------------------|-----------------------------------------------|-------------------------|------------------------------------------------------------------------------------------------------------------------------------------------------------------------------------------|
| Overlap     | D                 | <code>ecospat.niche.overlap()</code>          | <code>ecospat</code>    | Calculates the overlap metric D based on two species or populations occurrence density grids. Density grids are calculated with the function <code>ecospat.grid.clim.dyn()</code>        |
| Equivalency | Niche equivalency | <code>ecospat.niche.equivalency.test()</code> | <code>ecospat</code>    | Runs a niche equivalency test (Warren et al. 2008) between two species based on their density grids. Density grids are calculated with the function <code>ecospat.grid.clim.dyn()</code> |
| Disparity   | Data disparity    | <code>centroid()</code>                       | <code>disparRity</code> | Average Euclidian distance between each data point (specimen) and the centroid for their environmental niche space                                                                       |



**Table S4.**

Test for niche overlap (mean overlap for 100 iterations and standard deviation) between different time intervals for the 46 species of mammals in the study.

| Species                         | Post Glacial to Agricultural | Agricultural to European | European to Industrial | Industrial to Present | Post Glacial vs Present | Agricultural vs Present | European vs Present | Pre-vs Post-Industrial |
|---------------------------------|------------------------------|--------------------------|------------------------|-----------------------|-------------------------|-------------------------|---------------------|------------------------|
| <i>Antilocapra americana</i>    | 0.644 +/- 0.03               | 0.546 +/- 0.055          | 0.483 +/- 0.048        | 0.627 +/- 0.026       | 0.389 +/- 0.029         | 0.491 +/- 0.022         | 0.36 +/- 0.023      | 0.524 +/- 0.006        |
| <i>Bison bison</i>              | 0.671 +/- 0.025              | 0.631 +/- 0.035          | 0.463 +/- 0.007        | 0.622 +/- 0.019       | 0.36 +/- 0.017          | 0.379 +/- 0.082         | 0.387 +/- 0.014     | 0.471 +/- 0.019        |
| <i>Blarina brevicauda</i>       | 0.158 +/- 0.015              | 0.403 +/- 0.009          | 0.514 +/- 0.06         | 0.75 +/- 0.02         | 0.18 +/- 0.029          | 0.523 +/- 0.101         | 0.453 +/- 0.049     | 0.349 +/- 0.018        |
| <i>Canis latrans</i>            | 0.531 +/- 0.037              | 0.492 +/- 0.034          | 0.433 +/- 0.055        | 0.546 +/- 0.013       | 0.371 +/- 0.046         | 0.367 +/- 0.052         | 0.34 +/- 0.056      | 0.473 +/- 0.03         |
| <i>Canis lupus</i>              | 0.43 +/- 0.054               | 0.548 +/- 0.027          | 0.468 +/- 0.077        | 0.5 +/- 0.02          | 0.236 +/- 0.055         | 0.269 +/- 0.044         | 0.335 +/- 0.075     | 0.309 +/- 0.032        |
| <i>Castor canadensis</i>        | 0.505 +/- 0.033              | 0.477 +/- 0.056          | 0.444 +/- 0.031        | 0.612 +/- 0.014       | 0.312 +/- 0.03          | 0.378 +/- 0.009         | 0.391 +/- 0.03      | 0.34 +/- 0.013         |
| <i>Cervus elaphus</i>           | 0.671 +/- 0.044              | 0.211 +/- 0.038          | 0.417 +/- 0.022        | 0.412 +/- 0.02        | 0.153 +/- 0.023         | 0.135 +/- 0.035         | 0.385 +/- 0.015     | 0.156 +/- 0.019        |
| <i>Cynomys ludovicianus</i>     | 0.492 +/- 0.105              | 0.661 +/- 0.037          | 0.619 +/- 0.067        | 0.805 +/- 0.013       | 0.486 +/- 0.057         | 0.71 +/- 0.03           | 0.7 +/- 0.054       | 0.607 +/- 0.031        |
| <i>Dipodomys ordii</i>          | 0.652 +/- 0.062              | 0.462 +/- 0.022          | 0.256 +/- 0.084        | 0.758 +/- 0.014       | 0.358 +/- 0.141         | 0.434 +/- 0.119         | 0.238 +/- 0.091     | 0.398 +/- 0.094        |
| <i>Eptesicus fuscus</i>         | 0.502 +/- 0.062              | 0.331 +/- 0.081          | 0.579 +/- 0.083        | 0.608 +/- 0.027       | 0.346 +/- 0.111         | 0.282 +/- 0.156         | 0.427 +/- 0.111     | 0.329 +/- 0.09         |
| <i>Geomys bursarius</i>         | 0.604 +/- 0.042              | 0.443 +/- 0.102          | 0.486 +/- 0.068        | 0.65 +/- 0.049        | 0.523 +/- 0.048         | 0.579 +/- 0.062         | 0.515 +/- 0.063     | 0.582 +/- 0.045        |
| <i>Lepus californicus</i>       | 0.69 +/- 0.032               | 0.525 +/- 0.086          | 0.532 +/- 0.076        | 0.814 +/- 0.002       | 0.665 +/- 0.064         | 0.674 +/- 0.03          | 0.535 +/- 0.107     | 0.684 +/- 0.027        |
| <i>Lepus townsendii</i>         | 0.185 +/- 0.037              | 0.574 +/- 0.041          | 0.48 +/- 0.126         | 0.678 +/- 0.012       | 0.253 +/- 0.062         | 0.48 +/- 0.097          | 0.372 +/- 0.12      | 0.634 +/- 0.056        |
| <i>Lontra canadensis</i>        | 0.443 +/- 0.07               | 0.228 +/- 0.051          | 0.536 +/- 0.033        | 0.463 +/- 0.047       | 0.316 +/- 0.098         | 0.359 +/- 0.053         | 0.401 +/- 0.059     | 0.318 +/- 0.046        |
| <i>Lynx rufus</i>               | 0.574 +/- 0.051              | 0.39 +/- 0.037           | 0.463 +/- 0.034        | 0.615 +/- 0.016       | 0.346 +/- 0.04          | 0.442 +/- 0.035         | 0.403 +/- 0.03      | 0.46 +/- 0.031         |
| <i>Marmota monax</i>            | 0.47 +/- 0.032               | 0.45 +/- 0.052           | 0.572 +/- 0.085        | 0.575 +/- 0.017       | 0.471 +/- 0.032         | 0.792 +/- 0.015         | 0.428 +/- 0.059     | 0.629 +/- 0.039        |
| <i>Mephitis mephitis</i>        | 0.392 +/- 0.032              | 0.401 +/- 0.028          | 0.431 +/- 0.044        | 0.583 +/- 0.006       | 0.301 +/- 0.038         | 0.295 +/- 0.034         | 0.302 +/- 0.054     | 0.381 +/- 0.031        |
| <i>Microtus montanus</i>        | 0.582 +/- 0.059              | 0.225 +/- 0.039          | 0.192 +/- 0.109        | 0.694 +/- 0.023       | 0.34 +/- 0.145          | 0.32 +/- 0.155          | 0.229 +/- 0.153     | 0.355 +/- 0.117        |
| <i>Microtus ochrogaster</i>     | 0.204 +/- 0.031              | 0.541 +/- 0.048          | 0.49 +/- 0.052         | 0.793 +/- 0.022       | 0.176 +/- 0.028         | 0.482 +/- 0.031         | 0.406 +/- 0.046     | 0.292 +/- 0.026        |
| <i>Microtus pennsylvanicus</i>  | 0.106 +/- 0.016              | 0.618 +/- 0.036          | 0.622 +/- 0.076        | 0.713 +/- 0.019       | 0.138 +/- 0.02          | 0.597 +/- 0.122         | 0.583 +/- 0.071     | 0.276 +/- 0.034        |
| <i>Mustela frenata</i>          | 0.537 +/- 0.031              | 0.424 +/- 0.009          | 0.407 +/- 0.052        | 0.606 +/- 0.008       | 0.362 +/- 0.039         | 0.497 +/- 0.056         | 0.355 +/- 0.04      | 0.452 +/- 0.043        |
| <i>Neotoma cinerea</i>          | 0.683 +/- 0.033              | 0.452 +/- 0.185          | 0.441 +/- 0.063        | 0.678 +/- 0.015       | 0.382 +/- 0.05          | 0.387 +/- 0.049         | 0.439 +/- 0.046     | 0.389 +/- 0.038        |
| <i>Odocoileus hemionus</i>      | 0.597 +/- 0.048              | 0.359 +/- 0.038          | 0.513 +/- 0.058        | 0.546 +/- 0.011       | 0.341 +/- 0.042         | 0.422 +/- 0.04          | 0.344 +/- 0.049     | 0.402 +/- 0.032        |
| <i>Odocoileus virginianus</i>   | 0.607 +/- 0.059              | 0.52 +/- 0.034           | 0.417 +/- 0.033        | 0.519 +/- 0.017       | 0.327 +/- 0.05          | 0.452 +/- 0.008         | 0.375 +/- 0.067     | 0.41 +/- 0.01          |
| <i>Ondatra zibethicus</i>       | 0.364 +/- 0.034              | 0.561 +/- 0.033          | 0.322 +/- 0.072        | 0.683 +/- 0.007       | 0.25 +/- 0.041          | 0.29 +/- 0.026          | 0.236 +/- 0.056     | 0.326 +/- 0.018        |
| <i>Onychomys leucogaster</i>    | 0.713 +/- 0.021              | 0.501 +/- 0.019          | 0.557 +/- 0.075        | 0.64 +/- 0.054        | 0.35 +/- 0.082          | 0.293 +/- 0.078         | 0.49 +/- 0.122      | 0.269 +/- 0.049        |
| <i>Ovis canadensis</i>          | 0.536 +/- 0.051              | 0.34 +/- 0.078           | 0.449 +/- 0.035        | 0.479 +/- 0.029       | 0.254 +/- 0.04          | 0.413 +/- 0.056         | 0.57 +/- 0.028      | 0.383 +/- 0.005        |
| <i>Peromyscus leucopus</i>      | 0.252 +/- 0.041              | 0.481 +/- 0.037          | 0.27 +/- 0.08          | 0.573 +/- 0.034       | 0.29 +/- 0.072          | 0.288 +/- 0.108         | 0.193 +/- 0.068     | 0.34 +/- 0.099         |
| <i>Peromyscus maniculatus</i>   | 0.385 +/- 0.081              | 0.43 +/- 0.047           | 0.514 +/- 0.043        | 0.745 +/- 0.013       | 0.363 +/- 0.029         | 0.326 +/- 0.047         | 0.446 +/- 0.044     | 0.419 +/- 0.033        |
| <i>Procyon lotor</i>            | 0.469 +/- 0.072              | 0.494 +/- 0.027          | 0.478 +/- 0.039        | 0.595 +/- 0.019       | 0.226 +/- 0.046         | 0.45 +/- 0.025          | 0.387 +/- 0.05      | 0.467 +/- 0.026        |
| <i>Puma concolor</i>            | 0.423 +/- 0.102              | 0.402 +/- 0.009          | 0.287 +/- 0.049        | 0.493 +/- 0.055       | 0.216 +/- 0.069         | 0.2 +/- 0.034           | 0.355 +/- 0.045     | 0.252 +/- 0.059        |
| <i>Scalopus aquaticus</i>       | 0.555 +/- 0.027              | 0.262 +/- 0.051          | 0.458 +/- 0.067        | 0.755 +/- 0.017       | 0.347 +/- 0.083         | 0.354 +/- 0.079         | 0.399 +/- 0.066     | 0.361 +/- 0.042        |
| <i>Sciurus carolinensis</i>     | 0.587 +/- 0.04               | 0.604 +/- 0.031          | 0.411 +/- 0.099        | 0.604 +/- 0.021       | 0.174 +/- 0.052         | 0.243 +/- 0.039         | 0.207 +/- 0.04      | 0.274 +/- 0.037        |
| <i>Sciurus niger</i>            | 0.522 +/- 0.078              | 0.459 +/- 0.077          | 0.502 +/- 0.066        | 0.64 +/- 0.022        | 0.184 +/- 0.091         | 0.288 +/- 0.047         | 0.423 +/- 0.102     | 0.345 +/- 0.044        |
| <i>Sigmodon hispidus</i>        | 0.491 +/- 0.054              | 0.517 +/- 0.066          | 0.263 +/- 0.055        | 0.602 +/- 0.025       | 0.201 +/- 0.073         | 0.368 +/- 0.078         | 0.325 +/- 0.129     | 0.355 +/- 0.04         |
| <i>Sylvilagus audubonii</i>     | 0.517 +/- 0.13               | 0.383 +/- 0.101          | 0.377 +/- 0.123        | 0.741 +/- 0.024       | 0.326 +/- 0.162         | 0.528 +/- 0.062         | 0.308 +/- 0.134     | 0.525 +/- 0.055        |
| <i>Sylvilagus floridanus</i>    | 0.607 +/- 0.028              | 0.623 +/- 0.054          | 0.525 +/- 0.109        | 0.642 +/- 0.024       | 0.328 +/- 0.089         | 0.348 +/- 0.06          | 0.35 +/- 0.123      | 0.408 +/- 0.046        |
| <i>Sylvilagus nuttallii</i>     | 0.733 +/- 0.033              | 0.482 +/- 0.072          | 0.412 +/- 0.107        | 0.766 +/- 0.003       | 0.633 +/- 0.071         | 0.674 +/- 0.064         | 0.437 +/- 0.095     | 0.521 +/- 0.074        |
| <i>Tamias striatus</i>          | 0.268 +/- 0.034              | 0.579 +/- 0.026          | 0.586 +/- 0.083        | 0.73 +/- 0.015        | 0.324 +/- 0.045         | 0.605 +/- 0.078         | 0.594 +/- 0.057     | 0.609 +/- 0.064        |
| <i>Tamiasciurus hudsonicus</i>  | 0.08 +/- 0.008               | 0.261 +/- 0.119          | 0.482 +/- 0.047        | 0.717 +/- 0.026       | 0.144 +/- 0.03          | 0.223 +/- 0.141         | 0.404 +/- 0.053     | 0.313 +/- 0.038        |
| <i>Taxidea taxus</i>            | 0.622 +/- 0.042              | 0.484 +/- 0.048          | 0.511 +/- 0.03         | 0.711 +/- 0.016       | 0.449 +/- 0.063         | 0.54 +/- 0.056          | 0.46 +/- 0.049      | 0.508 +/- 0.036        |
| <i>Thomomys bottae</i>          | 0.63 +/- 0.063               | 0.346 +/- 0.023          | 0.552 +/- 0.056        | 0.767 +/- 0.009       | 0.393 +/- 0.118         | 0.359 +/- 0.069         | 0.591 +/- 0.059     | 0.405 +/- 0.066        |
| <i>Thomomys talpoides</i>       | 0.259 +/- 0.051              | 0.582 +/- 0.085          | 0.441 +/- 0.146        | 0.745 +/- 0.016       | 0.316 +/- 0.029         | 0.248 +/- 0.095         | 0.357 +/- 0.147     | 0.443 +/- 0.038        |
| <i>Urocyon cinereoargenteus</i> | 0.472 +/- 0.102              | 0.437 +/- 0.061          | 0.357 +/- 0.101        | 0.713 +/- 0.015       | 0.403 +/- 0.076         | 0.503 +/- 0.065         | 0.336 +/- 0.11      | 0.486 +/- 0.043        |
| <i>Ursus americanus</i>         | 0.329 +/- 0.035              | 0.373 +/- 0.026          | 0.385 +/- 0.032        | 0.499 +/- 0.024       | 0.257 +/- 0.045         | 0.339 +/- 0.043         | 0.281 +/- 0.039     | 0.357 +/- 0.029        |
| <i>Vulpes vulpes</i>            | 0.642 +/- 0.034              | 0.21 +/- 0.034           | 0.315 +/- 0.06         | 0.258 +/- 0.021       | 0.355 +/- 0.083         | 0.334 +/- 0.077         | 0.252 +/- 0.059     | 0.395 +/- 0.052        |

**Table S5.**

Test for niche equivalency between different time intervals for the 46 species of mammals in the study. In grey: Significant differences between time intervals as described in Warren et al. (2008) and Di Cola et al. (2017)

| Species                         | Post-Glacial to Agricultural | Agricultural to European | European to Industrial | Industrial to Present | Post-Glacial vs. Present | Agricultural vs. Present | European vs. Present | Before vs. After Industrial revolution |
|---------------------------------|------------------------------|--------------------------|------------------------|-----------------------|--------------------------|--------------------------|----------------------|----------------------------------------|
| <i>Antilocapra americana</i>    | 0.871                        | 0.95                     | 0.881                  | 0.168                 | 0.911                    | 0.287                    | 0.356                | 0.901                                  |
| <i>Bison bison</i>              | 0.97                         | 0.99                     | 0.317                  | 0.347                 | 0.545                    | 0.05                     | 0.287                | 0.040                                  |
| <i>Blarina brevicauda</i>       | 0.01                         | 0.347                    | 0.871                  | 1                     | 0.02                     | 0.069                    | 0.98                 | 0.010                                  |
| <i>Canis latrans</i>            | 0.485                        | 0.069                    | 0.03                   | 0.01                  | 0.564                    | 0.01                     | 0.01                 | 0.386                                  |
| <i>Canis lupus</i>              | 0.861                        | 0.644                    | 0.099                  | 0.02                  | 0.02                     | 0.01                     | 0.04                 | 0.010                                  |
| <i>Castor canadensis</i>        | 0.822                        | 0.861                    | 0.376                  | 0.406                 | 0.158                    | 0.01                     | 0.515                | 0.010                                  |
| <i>Cervus elaphus</i>           | 0.812                        | 0.01                     | 0.158                  | 0.03                  | 0.01                     | 0.01                     | 0.178                | 0.010                                  |
| <i>Cynomys ludovicianus</i>     | 0.267                        | 0.634                    | 0.337                  | 0.98                  | 0.05                     | 0.663                    | 0.564                | 0.139                                  |
| <i>Dipodomys ordii</i>          | 0.426                        | 0.01                     | 0.01                   | 0.98                  | 0.02                     | 0.327                    | 0.01                 | 0.337                                  |
| <i>Eptesicus fuscus</i>         | 0.158                        | 0.02                     | 0.168                  | 0.01                  | 0.059                    | 0.01                     | 0.04                 | 0.010                                  |
| <i>Geomys bursarius</i>         | 0.198                        | 0.287                    | 0.337                  | 0.782                 | 0.03                     | 0.04                     | 0.109                | 0.010                                  |
| <i>Lepus californicus</i>       | 0.683                        | 0.455                    | 0.832                  | 1                     | 1                        | 1                        | 0.683                | 1.000                                  |
| <i>Lepus townsendii</i>         | 0.03                         | 0.594                    | 0.188                  | 0.168                 | 0.347                    | 0.01                     | 0.069                | 0.950                                  |
| <i>Lontra canadensis</i>        | 0.545                        | 0.04                     | 1                      | 0.168                 | 0.208                    | 0.04                     | 0.931                | 0.020                                  |
| <i>Lynx rufus</i>               | 0.812                        | 0.059                    | 0.891                  | 0.218                 | 0.257                    | 0.03                     | 1                    | 0.178                                  |
| <i>Marmota monax</i>            | 0.139                        | 0.356                    | 0.673                  | 0.228                 | 0.198                    | 1                        | 0.406                | 0.535                                  |
| <i>Mephitis mephitis</i>        | 0.248                        | 0.257                    | 0.238                  | 0.921                 | 0.139                    | 0.01                     | 0.059                | 0.010                                  |
| <i>Microtus montanus</i>        | 0.842                        | 0.01                     | 0.01                   | 0.584                 | 0.465                    | 0.109                    | 0.02                 | 0.139                                  |
| <i>Microtus ochrogaster</i>     | 0.01                         | 0.01                     | 0.01                   | 0.307                 | 0.01                     | 0.01                     | 0.01                 | 0.010                                  |
| <i>Microtus pennsylvanicus</i>  | 0.01                         | 0.762                    | 0.96                   | 0.97                  | 0.01                     | 0.149                    | 0.95                 | 0.010                                  |
| <i>Mustela frenata</i>          | 0.782                        | 0.04                     | 0.436                  | 0.505                 | 0.584                    | 0.099                    | 0.475                | 0.030                                  |
| <i>Neotoma cinerea</i>          | 1                            | 0.653                    | 0.287                  | 0.95                  | 0.366                    | 0.05                     | 0.743                | 0.020                                  |
| <i>Odocoileus hemionus</i>      | 0.663                        | 0.05                     | 0.604                  | 0.139                 | 0.396                    | 0.05                     | 0.257                | 0.020                                  |
| <i>Odocoileus virginianus</i>   | 0.327                        | 0.059                    | 0.02                   | 0.02                  | 0.02                     | 0.01                     | 0.089                | 0.010                                  |
| <i>Ondatra zibethicus</i>       | 0.04                         | 0.96                     | 0.01                   | 0.99                  | 0.03                     | 0.01                     | 0.01                 | 0.010                                  |
| <i>Onychomys leucogaster</i>    | 0.624                        | 0.069                    | 0.772                  | 0.733                 | 0.119                    | 0.01                     | 0.277                | 0.010                                  |
| <i>Ovis canadensis</i>          | 0.505                        | 0.069                    | 0.248                  | 0.059                 | 0.01                     | 0.059                    | 0.99                 | 0.020                                  |
| <i>Peromyscus leucopus</i>      | 0.158                        | 0.366                    | 0.01                   | 0.96                  | 0.574                    | 0.01                     | 0.01                 | 0.020                                  |
| <i>Peromyscus maniculatus</i>   | 0.238                        | 0.05                     | 0.545                  | 1                     | 0.723                    | 0.01                     | 0.713                | 0.010                                  |
| <i>Procyon lotor</i>            | 0.01                         | 0.356                    | 0.475                  | 0.624                 | 0.01                     | 0.01                     | 0.495                | 0.010                                  |
| <i>Puma concolor</i>            | 0.733                        | 0.366                    | 0.02                   | 0.248                 | 0.109                    | 0.02                     | 0.634                | 0.010                                  |
| <i>Scalopus aquaticus</i>       | 0.158                        | 0.01                     | 0.02                   | 0.99                  | 0.01                     | 0.01                     | 0.03                 | 0.010                                  |
| <i>Sciurus carolinensis</i>     | 0.515                        | 0.762                    | 0.01                   | 0.089                 | 0.01                     | 0.01                     | 0.01                 | 0.010                                  |
| <i>Sciurus niger</i>            | 0.436                        | 0.228                    | 0.554                  | 0.861                 | 0.01                     | 0.01                     | 0.248                | 0.010                                  |
| <i>Sigmodon hispidus</i>        | 0.03                         | 0.158                    | 0.01                   | 0.96                  | 0.01                     | 0.149                    | 0.04                 | 0.010                                  |
| <i>Sylvilagus audubonii</i>     | 0.257                        | 0.059                    | 0.01                   | 0.98                  | 0.139                    | 0.673                    | 0.04                 | 0.772                                  |
| <i>Sylvilagus floridanus</i>    | 0.416                        | 0.515                    | 0.139                  | 0.733                 | 0.01                     | 0.01                     | 0.01                 | 0.010                                  |
| <i>Sylvilagus nuttallii</i>     | 0.782                        | 0.069                    | 0.04                   | 0.376                 | 0.277                    | 0.228                    | 0.04                 | 0.020                                  |
| <i>Tamias striatus</i>          | 0.01                         | 0.931                    | 0.594                  | 1                     | 0.129                    | 0.069                    | 1                    | 0.178                                  |
| <i>Tamiasciurus hudsonicus</i>  | 0.01                         | 0.01                     | 0.634                  | 1                     | 0.119                    | 0.01                     | 1                    | 0.139                                  |
| <i>Taxidea taxus</i>            | 0.99                         | 0.515                    | 0.663                  | 0.881                 | 0.713                    | 0.752                    | 1                    | 0.772                                  |
| <i>Thomomys bottae</i>          | 0.624                        | 0.02                     | 0.03                   | 0.891                 | 0.04                     | 0.01                     | 0.267                | 0.010                                  |
| <i>Thomomys talpoides</i>       | 0.089                        | 0.574                    | 0.267                  | 0.931                 | 0.525                    | 0.01                     | 0.267                | 0.099                                  |
| <i>Urocyon cinereoargenteus</i> | 0.851                        | 0.01                     | 0.01                   | 1                     | 0.198                    | 0.257                    | 0.01                 | 0.119                                  |
| <i>Ursus americanus</i>         | 0.465                        | 0.416                    | 0.079                  | 0.01                  | 0.327                    | 0.01                     | 0.119                | 0.010                                  |
| <i>Vulpes vulpes</i>            | 1                            | 0.02                     | 0.02                   | 0.01                  | 0.347                    | 0.05                     | 0.406                | 0.040                                  |

**Table S6.**

Disparity for each studied time interval. Disparity described as the average Euclidian distance from the centroid (see Methods)

| Species                         | Post-Glacial | Agricultural | European | Industrial | Present |
|---------------------------------|--------------|--------------|----------|------------|---------|
| <i>Antilocapra americana</i>    | 14.265       | 11.297       | 9.029    | 10.621     | 7.508   |
| <i>Bison bison</i>              | 15.300       | 16.823       | 15.857   | 10.826     | 11.742  |
| <i>Blarina brevicauda</i>       | 19.341       | 12.663       | 11.578   | 13.906     | 16.056  |
| <i>Canis latrans</i>            | 22.918       | 19.106       | 22.175   | 21.874     | 29.997  |
| <i>Canis lupus</i>              | 22.382       | 24.447       | 28.955   | 26.270     | 26.913  |
| <i>Castor canadensis</i>        | 25.701       | 20.640       | 31.029   | 24.943     | 28.599  |
| <i>Cervus elaphus</i>           | 26.536       | 20.474       | 38.917   | 33.453     | 29.600  |
| <i>Cynomys ludovicianus</i>     | 17.428       | 7.824        | 9.040    | 8.864      | 9.854   |
| <i>Dipodomys ordii</i>          | 8.578        | 10.499       | 5.876    | 10.089     | 10.641  |
| <i>Eptesicus fuscus</i>         | 21.318       | 16.729       | 32.099   | 26.537     | 26.072  |
| <i>Geomys bursarius</i>         | 18.530       | 13.534       | 18.828   | 15.486     | 17.460  |
| <i>Lepus californicus</i>       | 14.007       | 13.954       | 13.448   | 18.494     | 13.609  |
| <i>Lepus townsendii</i>         | 12.185       | 7.741        | 7.051    | 10.158     | 8.592   |
| <i>Lontra canadensis</i>        | 24.712       | 18.547       | 23.589   | 22.494     | 23.695  |
| <i>Lynx rufus</i>               | 31.086       | 28.911       | 37.250   | 28.307     | 28.488  |
| <i>Marmota monax</i>            | 10.866       | 11.400       | 11.924   | 13.458     | 13.039  |
| <i>Mephitis mephitis</i>        | 26.989       | 20.966       | 28.533   | 27.424     | 25.400  |
| <i>Microtus montanus</i>        | 7.601        | 13.838       | 5.772    | 16.019     | 13.867  |
| <i>Microtus ochrogaster</i>     | 15.628       | 16.065       | 19.415   | 20.305     | 21.084  |
| <i>Microtus pennsylvanicus</i>  | 28.342       | 20.833       | 21.680   | 21.946     | 21.588  |
| <i>Mustela frenata</i>          | 23.036       | 25.120       | 30.550   | 26.512     | 28.073  |
| <i>Neotoma cinerea</i>          | 19.530       | 11.597       | 21.321   | 27.093     | 20.522  |
| <i>Odocoileus hemionus</i>      | 13.263       | 11.353       | 29.552   | 26.846     | 20.572  |
| <i>Odocoileus virginianus</i>   | 13.672       | 15.471       | 18.504   | 22.373     | 26.604  |
| <i>Ondatra zibethicus</i>       | 26.865       | 20.814       | 24.504   | 27.181     | 28.231  |
| <i>Onychomys leucogaster</i>    | 11.687       | 12.984       | 8.467    | 9.913      | 10.689  |
| <i>Ovis canadensis</i>          | 11.355       | 9.342        | 12.489   | 15.466     | 12.137  |
| <i>Peromyscus leucopus</i>      | 21.337       | 14.266       | 23.139   | 18.779     | 25.247  |
| <i>Peromyscus maniculatus</i>   | 22.351       | 16.660       | 24.460   | 26.274     | 25.018  |
| <i>Procyon lotor</i>            | 16.052       | 17.558       | 26.820   | 26.891     | 28.307  |
| <i>Puma concolor</i>            | 28.759       | 29.277       | 35.435   | 34.109     | 24.254  |
| <i>Scalopus aquaticus</i>       | 16.426       | 11.042       | 16.839   | 18.926     | 20.879  |
| <i>Sciurus carolinensis</i>     | 9.862        | 11.645       | 13.127   | 17.863     | 20.472  |
| <i>Sciurus niger</i>            | 10.991       | 12.608       | 19.532   | 21.251     | 26.283  |
| <i>Sigmodon hispidus</i>        | 13.274       | 26.425       | 32.429   | 28.391     | 30.271  |
| <i>Sylvilagus audubonii</i>     | 7.348        | 10.055       | 8.772    | 11.873     | 9.452   |
| <i>Sylvilagus floridanus</i>    | 16.175       | 15.664       | 19.959   | 19.531     | 24.297  |
| <i>Sylvilagus nuttallii</i>     | 6.015        | 8.681        | 5.175    | 10.140     | 8.016   |
| <i>Tamias striatus</i>          | 15.822       | 11.853       | 10.842   | 14.973     | 14.903  |
| <i>Tamiasciurus hudsonicus</i>  | 27.902       | 20.010       | 27.928   | 22.243     | 22.646  |
| <i>Taxidea taxus</i>            | 20.466       | 18.659       | 12.569   | 16.652     | 16.350  |
| <i>Thomomys bottae</i>          | 7.902        | 10.530       | 10.492   | 18.897     | 13.098  |
| <i>Thomomys talpoides</i>       | 17.687       | 8.849        | 11.302   | 14.265     | 14.212  |
| <i>Urocyon cinereoargenteus</i> | 27.984       | 26.375       | 25.863   | 28.905     | 29.393  |
| <i>Ursus americanus</i>         | 26.618       | 21.105       | 26.132   | 30.461     | 26.320  |
| <i>Vulpes vulpes</i>            | 25.999       | 24.216       | 27.234   | 16.497     | 25.728  |

**Table S7.**

Habitat Niche Change (HNC) values for the 46 species in the study and different land-cover categories between the Present and the Post-Glacial time intervals.

| Speices                         | Urban   | Cropland | Grassland | Forest  | Alpine  |
|---------------------------------|---------|----------|-----------|---------|---------|
| <i>Antilocapra americana</i>    | -0.1226 | -0.2018  | -0.2427   | -0.0916 | -0.2081 |
| <i>Bison bison</i>              | -0.1804 | -0.2316  | -0.3012   | -0.1023 | -0.1568 |
| <i>Blarina brevicauda</i>       | 0.2437  | 0.1332   | 0.0124    | 0.1054  | -0.1174 |
| <i>Canis latrans</i>            | 0.0366  | -0.0426  | -0.2866   | 0.0829  | -0.2405 |
| <i>Canis lupus</i>              | 0.149   | -0.0252  | -0.2121   | 0.185   | -0.1594 |
| <i>Castor canadensis</i>        | -0.1767 | -0.0879  | -0.1012   | 0.0637  | -0.1626 |
| <i>Cervus elaphus</i>           | -0.3347 | -0.2498  | -0.2025   | -0.0599 | 0.0888  |
| <i>Cynomys ludovicianus</i>     | -0.1164 | -0.0831  | 0.0595    | -0.0061 | -0.1566 |
| <i>Dipodomys ordii</i>          | 0.1664  | 0.1615   | 0.1621    | 0.0979  | -0.064  |
| <i>Eptesicus fuscus</i>         | -0.1658 | 0.1036   | -0.0511   | 0.1362  | -0.148  |
| <i>Geomys bursarius</i>         | -0.1402 | -0.0284  | 0.0621    | 0.0594  | -0.2331 |
| <i>Lepus californicus</i>       | 0.0618  | 0.0522   | -0.0077   | 0.044   | -0.1556 |
| <i>Lepus townsendii</i>         | -0.0142 | -0.139   | -0.0597   | -0.0524 | -0.1363 |
| <i>Lontra canadensis</i>        | -0.2417 | -0.1536  | -0.1896   | 0.0257  | -0.2196 |
| <i>Lynx rufus</i>               | -0.1835 | -0.2672  | -0.3376   | -0.0359 | -0.2399 |
| <i>Marmota monax</i>            | -0.0392 | 0.0012   | 0.0519    | -0.0047 | -0.1569 |
| <i>Mephitis mephitis</i>        | -0.0595 | -0.0181  | 0.0038    | 0.0555  | -0.3047 |
| <i>Microtus montanus</i>        | 0.0578  | 0.0891   | 0.0319    | 0.1343  | 0.0392  |
| <i>Microtus ochrogaster</i>     | -0.0007 | -0.0552  | -0.053    | -0.001  | -0.2318 |
| <i>Microtus pennsylvanicus</i>  | 0.2129  | 0.1896   | 0.1375    | 0.0986  | -0.0934 |
| <i>Mustela frenata</i>          | 0.0426  | -0.0468  | -0.2517   | 0.0782  | -0.0974 |
| <i>Neotoma cinerea</i>          | 0.0246  | -0.0307  | -0.1992   | 0.0573  | -0.0511 |
| <i>Odocoileus hemionus</i>      | 0.0189  | -0.0971  | -0.1944   | 0.0209  | -0.0909 |
| <i>Odocoileus virginianus</i>   | -0.2371 | 0.0248   | -0.0769   | 0.142   | -0.2813 |
| <i>Ondatra zibethicus</i>       | -0.1631 | -0.0482  | -0.1135   | 0.095   | -0.1815 |
| <i>Onychomys leucogaster</i>    | -0.0204 | -0.0012  | -0.0786   | 0.0184  | -0.1529 |
| <i>Ovis canadensis</i>          | 0.078   | -0.089   | -0.0298   | -0.047  | -0.1513 |
| <i>Peromyscus leucopus</i>      | 0.2374  | 0.1768   | -0.0125   | 0.1947  | -0.1904 |
| <i>Peromyscus maniculatus</i>   | 0.0832  | -0.0381  | -0.1421   | 0.0893  | -0.099  |
| <i>Procyon lotor</i>            | -0.2975 | 0.0357   | -0.0869   | 0.1861  | -0.2509 |
| <i>Puma concolor</i>            | -0.3953 | -0.3241  | -0.1918   | -0.1796 | -0.2819 |
| <i>Scalopus aquaticus</i>       | -0.0845 | 0.0443   | -0.1525   | 0.21    | -0.2268 |
| <i>Sciurus carolinensis</i>     | -0.1355 | 0.0952   | -0.0106   | 0.2315  | -0.1377 |
| <i>Sciurus niger</i>            | -0.0451 | 0.1714   | 0.0737    | 0.2653  | -0.1601 |
| <i>Sigmodon hispidus</i>        | 0.0965  | 0.1508   | -0.1979   | 0.2511  | -0.1482 |
| <i>Sylvilagus audubonii</i>     | 0.1331  | 0.1834   | 0.1207    | 0.1491  | -0.0267 |
| <i>Sylvilagus floridanus</i>    | -0.0271 | 0.1538   | -0.0775   | 0.2192  | -0.2135 |
| <i>Sylvilagus nuttallii</i>     | 0.0061  | 0.0428   | 0.0547    | 0.0617  | -0.0502 |
| <i>Tamias striatus</i>          | 0.0904  | 0.0554   | -0.0031   | 0.0282  | -0.2162 |
| <i>Tamiasciurus hudsonicus</i>  | 0.066   | 0.1619   | 0.1362    | 0.1393  | 0.0316  |
| <i>Taxidea taxus</i>            | 0.0435  | 0.0322   | -0.0103   | 0.06    | -0.1733 |
| <i>Thomomys bottae</i>          | 0.1171  | 0.0999   | 0.0266    | 0.0804  | -0.0604 |
| <i>Thomomys talpoides</i>       | -0.0176 | -0.089   | -0.1276   | 0.0075  | -0.0722 |
| <i>Urocyon cinereoargenteus</i> | 0.0251  | 0.0926   | 0.0783    | 0.1256  | -0.256  |
| <i>Ursus americanus</i>         | -0.1424 | -0.0765  | -0.0311   | 0.0229  | -0.0579 |
| <i>Vulpes vulpes</i>            | 0.0244  | -0.0643  | -0.2891   | 0.1491  | -0.1764 |

**Table S8.**

Habitat Niche Change (HNC) values for the 46 species in the study and different land-cover categories between the Pre-Industrial and Post-Industrial time intervals.

| Species                         | Urban      | Cropland   | Grassland  | Forest     | Alpine     |
|---------------------------------|------------|------------|------------|------------|------------|
| <i>Antilocapra americana</i>    | -0.0964391 | -0.106533  | -0.2815058 | -0.0341236 | -0.0111757 |
| <i>Bison bison</i>              | -0.1117405 | -0.133613  | -0.2932733 | -0.0553899 | 0.05028194 |
| <i>Blarina brevicauda</i>       | 0.03909034 | 0.03977105 | -0.0358994 | 0.25750733 | -0.0502662 |
| <i>Canis latrans</i>            | 0.0489894  | 0.03199618 | -0.2140209 | 0.02254272 | 0.00055247 |
| <i>Canis lupus</i>              | 0.0816038  | 0.0144175  | -0.1553488 | -0.1393561 | -0.040311  |
| <i>Castor canadensis</i>        | -0.2864205 | -0.1937894 | -0.186109  | -0.2723274 | 0.11217055 |
| <i>Cervus elaphus</i>           | -0.3229195 | -0.2546163 | -0.2851885 | -0.4062268 | 0.25484628 |
| <i>Cynomys ludovicianus</i>     | -0.0288382 | 0.0101602  | 0.08248428 | -0.025241  | -0.0070019 |
| <i>Dipodomys ordii</i>          | 0.07813356 | 0.0901783  | 0.01444186 | -0.0363338 | -0.007805  |
| <i>Eptesicus fuscus</i>         | -0.0986645 | 0.15982289 | -0.027604  | -0.1405921 | -0.0013023 |
| <i>Geomys bursarius</i>         | -0.0003157 | 0.10267251 | 0.01921876 | -0.0940993 | 0.0010197  |
| <i>Lepus californicus</i>       | 0.05258913 | 0.06631996 | -0.0122192 | 0.00137132 | -0.0088565 |
| <i>Lepus townsendii</i>         | -0.0070471 | -0.0247111 | -0.0362774 | -0.0109427 | -0.0404546 |
| <i>Lontra canadensis</i>        | -0.2469601 | -0.0944339 | -0.0776924 | -0.0355835 | 0.12684524 |
| <i>Lynx rufus</i>               | -0.1806857 | -0.2194602 | -0.1990806 | -0.0611865 | 0.07069741 |
| <i>Marmota monax</i>            | -0.0249903 | 0.0270296  | 0.00653243 | 0.07830072 | -0.0003973 |
| <i>Mephitis mephitis</i>        | -0.1738114 | -0.0646318 | -0.0956314 | -0.2282775 | -0.0215362 |
| <i>Microtus montanus</i>        | 0.02085895 | 0.06064415 | -0.0296731 | 0.02933894 | 0.07449624 |
| <i>Microtus ochrogaster</i>     | 0.0120085  | -0.0964063 | -0.1670152 | -0.0312862 | -0.0951581 |
| <i>Microtus pennsylvanicus</i>  | 0.08049763 | 0.04218523 | 0.06085025 | 0.24717015 | -0.1351304 |
| <i>Mustela frenata</i>          | 0.02000544 | -0.0448917 | -0.2163291 | 0.0256724  | 0.00484948 |
| <i>Neotoma cinerea</i>          | 0.02314936 | -0.0125145 | -0.1742216 | 0.03937506 | 0.03737153 |
| <i>Odocoileus hemionus</i>      | 0.02540739 | -0.0165922 | -0.2288761 | 0.01556584 | 0.02689595 |
| <i>Odocoileus virginianus</i>   | -0.2445225 | -0.0562807 | -0.0840724 | -0.1032155 | 0.07019702 |
| <i>Ondatra zibethicus</i>       | -0.1721541 | -0.0744511 | -0.1607788 | -0.1578898 | 0.05003672 |
| <i>Onychomys leucogaster</i>    | -0.0230841 | 0.04406757 | -0.1009476 | -0.0556201 | -0.0004082 |
| <i>Ovis canadensis</i>          | -0.0080099 | -0.0828078 | -0.1972726 | -0.0587813 | -0.0288468 |
| <i>Peromyscus leucopus</i>      | 0.11964822 | 0.14353838 | -0.1608249 | -0.0718064 | -0.0420368 |
| <i>Peromyscus maniculatus</i>   | 0.03677335 | -0.0245578 | -0.1860927 | 0.0040279  | 0.01629183 |
| <i>Procyon lotor</i>            | -0.2437066 | -0.0585507 | -0.015927  | -0.1216729 | 0.02367722 |
| <i>Puma concolor</i>            | -0.4429465 | -0.3248287 | -0.1116821 | -0.1605663 | 0.03483109 |
| <i>Scalopus aquaticus</i>       | 0.067798   | 0.17282646 | -0.1227129 | -0.0751306 | -0.0010937 |
| <i>Sciurus carolinensis</i>     | -0.0727335 | 0.12112253 | -0.0289161 | -0.2252364 | 0.01568803 |
| <i>Sciurus niger</i>            | -0.0819041 | 0.11356813 | 0.00397794 | -0.1167843 | 0.01095544 |
| <i>Sigmodon hispidus</i>        | 0.00991641 | 0.09490078 | -0.1694461 | -0.0017033 | 0.00044933 |
| <i>Sylvilagus audubonii</i>     | 0.034249   | 0.06012661 | -0.0047254 | -0.0096628 | 0.00027343 |
| <i>Sylvilagus floridanus</i>    | 0.03448203 | 0.16032327 | -0.104828  | -0.0789717 | 0.01158025 |
| <i>Sylvilagus nuttallii</i>     | 0.02546628 | 0.07425549 | 0.11660958 | 0.04236157 | 0.01143265 |
| <i>Tamias striatus</i>          | -0.0566015 | 0.04097295 | -0.0303442 | 0.05610846 | 0.0208472  |
| <i>Tamiasciurus hudsonicus</i>  | -0.0241222 | 0.02197177 | 0.03867663 | 0.05409335 | -0.1231638 |
| <i>Taxidea taxus</i>            | -0.0599288 | 0.00388477 | -0.1250615 | -0.0460776 | 0.01672422 |
| <i>Thomomys bottae</i>          | 0.09698781 | 0.08309097 | -0.0677113 | -0.0178512 | -0.017104  |
| <i>Thomomys talpoides</i>       | 0.00495795 | -0.013219  | -0.0904473 | 0.07323052 | 0.00568724 |
| <i>Urocyon cinereoargenteus</i> | -0.0889567 | 0.04303273 | -0.0420706 | -0.1281508 | 0.00026295 |
| <i>Ursus americanus</i>         | -0.3640542 | -0.2194448 | -0.0382934 | -0.0839384 | 0.14477862 |
| <i>Vulpes vulpes</i>            | 0.05708824 | -0.0069102 | -0.2180686 | 0.01529878 | 0.02244121 |

## References

1. Di Cola, V., O. Broennimann, B. Petitpierre, F. T. Breiner, M. D'amen, C. Randin, R. Engler, J. Pottier, D. Pio, and A. Dubuis. 2017. ecospat: an R package to support spatial analyses and modeling of species niches and distributions. *Ecography* **40**:774-787.
2. Gotelli, N. J., and G. R. Graves. 1996. *Null Models in Ecology*. Smithsonian Institution Press, Washington, D.C.
3. Warren, D. L., R. E. Glor, and M. Turelli. 2008. Environmental niche equivalency versus conservatism: quantitative approaches to niche evolution. *Evolution* **62**:2868-2883.
